# Supplementary material for: Measuring methane emissions from oil and gas platforms in the North Sea
Source: Copernicus journal article supplement (doi:10.5194/acp-2019-90), 2019-02-18
Supplement: Supplementary file [file acp-2019-90-AC1-supplement.pdf]

Ms. Ref. No.: acp-2019-90

Title: Measuring methane emissions from oil and gas platforms in the North Sea

Department of Civil and Environmental Engineering  
Princeton University  
E320 Engineering Quad  
Princeton  
NJ

Email: [sriddick@princeton.edu](mailto:sriddick@princeton.edu)

18<sup>th</sup> June 2019

Dear Editor,

We thank Reviewer #1 for the comments and additional data supplied. As suggested, we have amended the manuscript to address the reviewers' comments and suggestions.

Please find our detailed responses below.

Yours sincerely,

Stuart Riddick (corresponding author)

Stuart N. Riddick, Denise L. Mauzerall, Michael Celia, Neil R. P. Harris, Grant Allen, Joseph Pitt, John Staunton-Sykes, Grant L. Forster, Mary Kang, David Lowry, Euan G. Nisbet, and Alistair J. Manning

## **Anonymous Referee #1**

### *General comment*

#### *Reviewer Comment:*

*I have reservations about: 1) the applicability of the Gaussian plume model to the conditions, though these reservations could well be ameliorated with additional information and author responses. 2) The relevance of the observations made at the coast 3) the quality of the results of the Keeling plot analysis 4) the uncertainty analysis of the Gaussian plume model*

*I may be missing it, but I can't find public access to much of the data in this paper. Best practices for reproducibility would have all data publicly accessible with access instructions given in the paper. I would appreciate the opportunity to inspect and analyze the data before making the recommendation to publish. There are a few places in the paper with insufficiently detailed information to fully understand the study - for example, what are the coordinates of the platforms and on what day was what platform observed? How much did winds vary over the course of the ship transects?*

#### *Author's response:*

In the responses below we address the reviewer's reservations regarding the suitability of the Gaussian plume model and the uncertainties. We also acknowledge the reviewer's concerns regarding the uncertainty analysis and have enhanced the content of this section to indicate the shortcomings of the measurement methodologies. To address the issue of data transparency we have introduced all data required to reproduce the emission estimates in Supplementary Materials Sections 1 and 2 and included latitudes and longitudes of the measured platforms.

With regard to the relevance of the observations made at the coast and the quality of the results of the Keeling plot analysis we have decided to remove these sections completely and make the focus of this manuscript solely on offshore measurements.

### *Critique #1*

*The use of a Gaussian plume model requires careful consideration of the assumptions that go into such a model. Namely, the model assumes a homogenous, steady state flow with a steady point source.*

*I think that, for the most part, the conditions in this study satisfy those assumptions, but I do have the following reservations.*

*The Gaussian plume model employed by the authors assumes an infinitely high boundary layer and homogenous mixing throughout the boundary layer which is to say that they include a reflection term at the surface, no reflection term at the top of the boundary layer, and a uniform vertical mixing. This is a marine environment in a cool climate during the summer, and so a marine layer is likely. This would come with a very low boundary layer height and temperature inversion near the ocean surface. The emission heights are 50-70m and the inlet height is 2.5m. The assumptions of homogenous vertical mixing and no reflection off the top of the boundary layer are at risk.*

*I had code on hand to extract and plot meteorological fields from the GFS global forecast model archives (raw data obtained from <https://ready.arl.noaa.gov/archives.php>). I extracted boundary layer heights and winds at 1300UTC on the days of the campaign and plotted them below. Boundary layer height capped at 1500m in the plot for visibility. These data carry the caveat that GFS archive forecast data has error – particularly in the boundary layer height. I am happy to share these data/plots with the authors for their own use if they wish.*

*The paper includes a plot of the studied platforms, but no quantitative description of the locations (e.g., latitude and longitude, and which day each was measured). However, it does appear that the boundary layer height in the vicinity of the platforms may have been quite low, depending on when each was observed.*

### **Author's response**

We thank the reviewer for highlighting issues with the Gaussian plume model and in particular for assisting our analysis by sharing data. We greatly appreciate these contributions and are confident that our additions have improved the manuscript. To address the reviewers concerns we have included the assumptions we have made when using the Gaussian plume model.

To specifically address the concerns over the plume's reflectance at the top of the boundary layer we have modified the Gaussian Plume model that we use to include terms that account for reflectance at the top of the boundary layer. The height of the boundary layer is taken from the Global Forecast System's global forecast model archives provided by the reviewer. These data are presented in the full data table in Supplementary Material Section 1, where all of the data used to calculate emissions from each platform can be found.

To address the issue of homogeneous mixing the shortcomings of the Gaussian plume model have been added to new sections: 2.2.5 Uncertainties; and 3.5 Uncertainties/shortcomings of Gaussian Plume modelling.

Change to manuscript:

P5 L8

“the height of the source ( $h_s$ , m), **the height of the boundary layer ( $h$ , m)** and the stability of the air (CERC, 2017; Hunt, 1982; Hunt et al., 1988). The standard deviation of the lateral ( $\sigma_y$ , m) and vertical ( $\sigma_z$ , m) mixing ratio distributions are calculated from the Pasquill Gifford stability class (PGSC) of the air (Pasquill, 1962; Busse and Zimmerman, 1973; US EPA, 1995). **Even though this modelling method is relatively simple, offshore emissions estimates using the same parameterization of  $\sigma_y$  and  $\sigma_z$  were made by Blackall et al. (2008) and were in good agreement ( $R^2 = 0.85$ ) with emissions calculated from a concurrent tracer release experiment. Alternative offshore parameterisations for  $\sigma_y$  and  $\sigma_z$  exist and are used in the EPA recommended Offshore and Coastal Dispersion Model (Hanna et al, 1985). However, these algorithms require further data on the micrometeorology which are not available and were therefore not used as they introduce additional unquantifiable uncertainty.**

$$X(x, y, z) = \frac{Q}{2\pi u \sigma_y \sigma_z} e^{-\frac{y^2}{2\sigma_y^2}} \left( e^{-\frac{(z-h_s)^2}{2\sigma_z^2}} + e^{-\frac{(z+h_s)^2}{2\sigma_z^2}} + e^{-\frac{(z-2h+h_s)^2}{2\sigma_z^2}} + e^{-\frac{(z+2h-h_s)^2}{2\sigma_z^2}} + e^{-\frac{(z-2h-h_s)^2}{2\sigma_z^2}} \right) \quad (1)$$

**The following assumptions are made regarding the Gaussian model: 1) The source is emitting CH<sub>4</sub> at a constant rate; 2) The mass of CH<sub>4</sub> is conserved when reflected at the surface of the ocean or the top of the boundary layer; 3) Wind speed and vertical eddy diffusivity are constant with time; 4) There is uniform vertical mixing; and 5) Terrain (ocean surface) is relatively flat between source and detector. The PGSC were determined for an offshore flow of air following the parametrizations described in Erbrink and Scholten (1995), Hanna et al. (1985) and Hsu (1992).”**

At P6 L1:

“The height of the boundary layer is calculated from the Global Forecast System’s global forecast model archives (GFS, 2019).”

At P6 L10

### **“2.5 Uncertainties**

Of the Gaussian plume model assumptions presented in Section 2.3, two may not be valid - uniform vertical mixing and a constant wind speed. The uncertainty in uniform vertical mixing is discussed in Section 3.4. To investigate how uncertainties in the measurements and modelling affect the calculated emission, we ran Gaussian plume model scenarios using data that reflect the input values’ uncertainty bounds. The scenarios run using the Gaussian plume approach were: varying wind speed (based on measurement); UGGA precision ( $\pm 2$  ppb); thermometer precision ( $\pm 0.1$  °C); the PGSC ( $+ 1$  PGSC); and distance from detector to emission source ( $\pm 50$  m). The uncertainties of the UGGA and thermometer were taken from literature. The uncertainty in the PGSC used reflects the possibility that the temperature of the natural gas leaving the subsurface could be hotter than air and therefore less stable. The uncertainty in distance from the emission source to the detector results from not knowing where gas is leaking; here we assume the leak could be from anywhere on a production platform that is 100 m long.”

P9 L10

### **“3.4 Uncertainties/shortcomings of Gaussian Plume modelling**

A range of scenarios were run using the Gaussian plume model to estimate uncertainty in average CH<sub>4</sub> emissions resulting from UGGA instrument precision, thermometer precision, varying wind speed, assessment of the PGSC and uncertainty in distance between the emission source and the detector. Uncertainty in the UGGA and the thermometer have little effect on the average emission estimate (Supplementary Material Section 3). The largest variability in wind speed was recorded during measurement of platform # 3 on the 6<sup>th</sup> July 2017 at  $4.4 \pm 0.6$  m s<sup>-1</sup> (Supplementary Material Section 1), using this variability in wind speed in the Gaussian plume model results in an uncertainty in average emission of  $\pm 12$  %. Uncertainty in estimating the distance between the emission source and the detector results in an uncertainty in average emissions of  $\pm 8$  %. The Gaussian plume model has the greatest response to the uncertainty in estimating the PGSC, resulting in an uncertainty of  $\pm 41$  %. We estimate the overall uncertainty in the average CH<sub>4</sub> emission, calculated as the root of the sum of the individual uncertainties squared, to be  $\pm 45$  %.

As mentioned in Section 2.5, the uniform vertical mixing assumption made in the Gaussian Plume model may not hold here as the data we collected provides no information on vertical mixing. However, the Gaussian plume model only assumes a constant vertical mixing rate between the source and the detector. In most cases this distance is relatively short and unlikely to significantly affect the calculation of emissions. In future experiments,

the vertical mixing rate could be calculated by measuring the vertical gradient of wind speeds to make an accurate thermodynamic profile.”

### *Critique #2*

*While the investigation that forms the bulk of the study is logically solid, the abstract begins with a line of reasoning that is quite circumstantial. It describes what motivated the study. While it is interesting to read about the authors motivation, excluding this information would make the definitive methods of the investigation clearer.*

*The passage is: “Recent studies suggest oil and natural gas production facilities in North America may be underestimating methane (CH<sub>4</sub>) emissions during extraction. This, coupled with unusually high CH<sub>4</sub> mole fractions observed at coastal sites during onshore winds in the UK, suggests CH<sub>4</sub> emissions from oil and gas extractions in the North Sea could be higher than previously reported.”*

*I don't think the conclusion necessarily follows. Emissions can vary greatly between facilities and across production fields. The geology and technology used in the North American fields where the aforementioned studies were conducted is much different than those of the North Sea. Unusually high mole fractions observed at the coast when winds came from the sea do not necessarily point to emissions from the oil and gas industry. Airmass trajectories can be quite complicated and there are many sources on a continental scale.*

*If the authors want to include the in-situ observations at Weymouth in the paper, then they should include a trajectory analysis. The paper does work without this passage, though.*

### *Author's response:*

As suggested by the reviewer, using coastal observations to infer large emissions from offshore oil and gas operations is very difficult. The initial intention of the isotopic analysis of air collected during a Northerly wind event was to test if the air could have come from production platforms, i.e. has the isotopic signature as gas collected offshore. Unfortunately, as the analysis progressed it became apparent that these measurements could not be used to definitively identify the source.

To address these concerns in the manuscript we have removed the onshore/isotopic observations, the first sentence in the abstract has been removed and the second sentence edited.

### *Change to manuscript:*

At P1 L17:

“**To investigate whether offshore oil and gas platforms leak methane (CH<sub>4</sub>) during normal operation,** we measured CH<sub>4</sub> mole fractions around eight oil and gas production platforms in the North Sea which were neither flaring gas nor off-loading oil.”

### *Critique #3*

*What is the uncertainty of the parameters of the linear model from your Keeling plot (Figure 2a)? What is the uncertainty in the source isotopic signature? From the appearance of the plot, there is a very poor correlation between observations and very high uncertainty in the source isotopic signature. It might be instructive to color the points by time. The data are likely insufficient to describe the source. It could just be that all the data were taken near each other in time, and so there is not enough variation in the CH<sub>4</sub> concentration to extract a signal.*

Author's response:

The reviewer's concerns over the isotopic analysis are justified. We feel that while this analysis could indicate offshore leakage, it does not necessarily compliment the central message of the manuscript, methane leaks from all offshore platforms. Instead of attempting to further justify the inclusion of the isotopic analysis to this body of work, we have decided to remove the section completely.

*Critique #4*

*The description of the uncertainty analysis for the Gaussian plume model is lacking in detail, and there are some red flags. For one, the total uncertainty is given as +/-54% while the uncertainty due to stability class uncertainty alone is estimated at 54%, and the greatest source of uncertainty is said to be the emission height.*

*The uncertainty analysis does not explicitly define what is meant by "uncertainty". It is said "The overall uncertainty, calculated as the root of the sum of individual uncertainties squared...". This implies that the uncertainties are standard deviations of normally distributed random errors. But the uncertainties are almost certainly correlated.*

Author's response:

New sections have been added to present and discuss the uncertainties in Gaussian Plume modelling.

Changes to the manuscript:

P6 L10

#### **"2.5 Uncertainties**

Of the Gaussian plume model assumptions presented in Section 2.3, two may not be valid - uniform vertical mixing and a constant wind speed. The uncertainty in uniform vertical mixing is discussed in Section 3.4. To investigate how uncertainties in the measurements and modelling affect the calculated emission, we ran Gaussian plume model scenarios using data that reflect the input values' uncertainty bounds. The scenarios run using the Gaussian plume approach were: varying wind speed (based on measurement); UGGA precision ( $\pm 2$  ppb); thermometer precision ( $\pm 0.1$  °C); the PGSC (+ 1 PGSC); and distance from detector to emission source ( $\pm 50$  m). The uncertainties of the UGGA and thermometer were taken from literature. The uncertainty in the PGSC used reflects the possibility that the temperature of the natural gas leaving the subsurface could be hotter than air and therefore less stable. The uncertainty in distance from the emission source to the detector results from not knowing where gas is leaking; here we assume the leak could be from anywhere on a production platform that is 100 m long."

*Technical correction #1*

*Page 1 The abstract should include a concise description of the methods*

Author's reply:

A concise description of the methods has been included in the abstract

Change to manuscript:

P1 L19:

“We use the measurements from summer 2017, along with meteorological data, in a Gaussian plume model to estimate CH<sub>4</sub> emissions from each platform.”

*Technical correction #2*

*Page 2, Figure 1 Caption: Mention Weymouth observatory.*

Author’s reply:

The caption in Figure 1 has been edited

Change to manuscript:

P2 L14:

“The map also shows the location of the University of East Anglia’s Weybourne Atmospheric Observatory (WAO; 52.95 °N, 1.14 °E) in Weybourne, Norfolk.”

*Technical correction #3*

*Page 3, Line 16: “To investigate the loss of CH<sub>4</sub> from offshore oil and gas installations we use two approaches; 1) determine whether the source of CH<sub>4</sub> enhancements at WAO could be from oil and gas production platforms; and 2) estimate an average CH<sub>4</sub> loss from offshore installations by making direct measurements of CH<sub>4</sub> emissions from off-shore production platforms in the North Sea”. The listed items don’t seem to be “approaches” to investigating the loss of CH<sub>4</sub>. Is this a typographical error? It would be nice to see this information replaced with a clear and concise description of the methods used in the paper.*

Author’s reply:

As suggested a brief description of the methods has been included.

Changes to manuscript:

P3 L23:

“To investigate the CH<sub>4</sub> loss from offshore oil and gas installations in UK waters, we measure CH<sub>4</sub> mixing ratios downwind of offshore platforms and use these data in a Gaussian plume model to estimate CH<sub>4</sub> emission rates. The CH<sub>4</sub> loss is then presented as a percentage of the CH<sub>4</sub> produced by each platform.”

*Technical correction #4*

*Page 3, Line 24: “between 10:00 and 13:00” please include time zone.*

Author’s response:

This section has been removed

*Technical correction #5*

*Page 4, Line 6: “Measurements from boats of CH<sub>4</sub> emissions from individual production platforms...” Careful, the CH<sub>4</sub> mole ratio was measured and the emission rate was estimated using a simple model. I think it’s a reach to say that the emissions were measured. The previous sentence uses my preferred language.*

Author’s reply:

Corrected as suggested.

Change to manuscript:

P3 L30

“Measurements were made during normal operation (i.e. pilot light on the flare stack was lit, but no flaring or offshore oil loading was observed)”

*Technical correction #6*

*Page 5, Line 7: “The gas is considered to be well-mixed within the volume of the cone” This is an inaccurate description of the Gaussian Plume model. A Gaussian Plume describes the distribution of the mass of the gas at a given time as a multivariate Gaussian in space. To say that the gas is well mixed within a volume would suggest a uniform distribution in a finite region.*

Author’s reply:

As suggested this line has been removed.

*Technical correction #6*

*Page 6, Figure 2a): The correlation here looks very weak.*

Author’s reply:

As the reviewer notes, the results from this measurement are ambiguous. To address this we have removed the section.

*Technical correction #7*

*Page 8, Figure 3: Can this figure this be a plate showing all the observations rather than just the observations from 1 platform? I’m assuming the arrow shows the average wind speed and direction? How much variability was there?*

Author’s reply:

All observations have been added as Supplementary Material Section 2.

During the measurements the highest uncertainty in wind speed during measurement was measured at  $\pm 0.6 \text{ m s}^{-1}$  during the measurement of platform ID # 3 on the 6<sup>th</sup> July 2017.

P9 L14

“The largest variability in wind speed was recorded during measurement of platform # 3 on the 6<sup>th</sup> July 2017 at  $4.4 \pm 0.6 \text{ m s}^{-1}$  (Supplementary Material Section 1), using this variability in wind speed in the Gaussian plume model results in an uncertainty in average emission of  $\pm 12 \%$ .”

*Technical correction #8*

*Page 9, Line 4: “The main uncertainty using the Gaussian plume approach in this study is in estimating the height of emission...” I would argue that there are many large sources of uncertainty in the Gaussian plume model, some of which are almost certainly greater than error in the emission height. For example, the assumption of homogenous diffusion.*

Author’s reply:



As suggested by the reviewer the section describing the uncertainties has been changed to include a systematic estimate of major uncertainties.

Changes to the manuscript:

P9 L10

### **“3.4 Uncertainties/shortcomings of Gaussian Plume modelling**

A range of scenarios were run using the Gaussian plume model to estimate uncertainty in average CH<sub>4</sub> emissions resulting from UGGA instrument precision, thermometer precision, varying wind speed, assessment of the PGSC and uncertainty in distance between the emission source and the detector. Uncertainty in the UGGA and the thermometer have little effect on the average emission estimate (Supplementary Material Section 3). The largest variability in wind speed was recorded during measurement of platform # 3 on the 6<sup>th</sup> July 2017 at  $4.4 \pm 0.6 \text{ m s}^{-1}$  (Supplementary Material Section 1), using this variability in wind speed in the Gaussian plume model results in an uncertainty in average emission of  $\pm 12 \%$ . Uncertainty in estimating the distance between the emission source and the detector results in an uncertainty in average emissions of  $\pm 8 \%$ . The Gaussian plume model has the greatest response to the uncertainty in estimating the PGSC, resulting in an uncertainty of  $\pm 41 \%$ . We estimate the overall uncertainty in the average CH<sub>4</sub> emission, calculated as the root of the sum of the individual uncertainties squared, to be  $\pm 45 \%$ .

As mentioned in Section 2.5, the uniform vertical mixing assumption made in the Gaussian Plume model may not hold here as the data we collected provides no information on vertical mixing. However, the Gaussian plume model only assumes a constant vertical mixing rate between the source and the detector. In most cases this distance is relatively short and unlikely to significantly affect the calculation of emissions. In future experiments, the vertical mixing rate could be calculated by measuring the vertical gradient of wind speeds to make an accurate thermodynamic profile.”

P10 L17

“The emission estimates presented here are from a pilot study and further work is needed to establish total CH<sub>4</sub> leakage rates from offshore oil and gas platforms. We have established, however, that CH<sub>4</sub> enhancements can be detected downwind of all production platforms during normal operations when neither venting, flaring or oil loading activities are taking place. Our measurements used in a Gaussian plume model indicate leakage from offshore installations are likely larger than previously estimated. However, these emission estimates come with large uncertainties as they are based on relatively few measured platforms, assume values for the height of emission, lateral and vertical mixing ratio distributions, and may not meet all the Gaussian plume model assumptions.

When the CH<sub>4</sub> emissions are calculated for two different emission heights, the importance of identifying the source location and height above the sea becomes apparent. The median CH<sub>4</sub> emissions from the five platforms is  $6.8 \text{ g s}^{-1}$  when the emissions are all assumed to come from the working deck, while the median emissions is  $2,658 \text{ g s}^{-1}$  (47% of production) when all CH<sub>4</sub> is assumed to be emitted from the flare i.e. the highest point of the platform. This analysis indicates that the median emission presented here, based on the assumption that the

emissions occur from the working deck, is a conservative estimate. However, without further measurements the height of the emission source cannot be definitively determined and this leaves the possibility that leakage is higher during normal operations than our results indicate. The other input variables that cannot be determined without further measurement are the lateral and vertical mixing ratio distributions but we feel that following the study of Blackall et al. (2007) the estimates used in this study are sufficient to establish leakage from oil and gas platforms and to provide a rough estimate of their emissions. As with the emission height, mixing can be resolved with further measurement, including the use of aircraft to resolve the vertical and horizontal mixing of the plume. It is clear that further studies are needed to provide additional data that will yield more definitive emission estimates. Using the near-source (< 1 km) observations of this paper (Fig. 2; Supplementary Material Section 2 platform #5 and #6) we can see that plumes from the leaks are compact (<200 m wide) and in some cases difficult to detect from sea-level measurements (Supplementary Material Section 2 platforms #7 and #8). Making 3-dimensional observations downwind of the platforms and using a sonic anemometer would help identify some of the unknowns presented here. Also, measuring more platforms over a longer time frame would improve the understanding of ambient leakage.

Any further measurements would be significantly easier with the cooperation of the oil and gas industry which could benefit from the findings. If the emissions are as low as the industry currently estimates, further measurements confirming low leakage rates would improve consumer confidence in oil and gas extraction activities. Alternately, if emissions are higher than currently reported, additional measurements would give the industry an opportunity to identify common issues such as incomplete combustion at the flare (Fig. 2), reduce leakage, and improve the efficiency of platforms thus potentially increasing profits from the extracted gas.”
